# Supplementary material
Source: publisher site journal article supplement (https://www.dovepress.com/article/322779)
Supplement: Supplementary file 1 [file get_supplementary_file.php]

# **SUPPLEMENTAL MATERIAL**

## **Risk stratification in patients with ischemic stroke and residual cardiovascular risk with current secondary prevention**

Mari Nordbø Gynnild, Steven H. J. Hageman, Jannick A. N. Dorresteijn, Olav Spigset,  
Stian Lydersen, Torgeir Wethal, Ingvild Saltvedt, Frank L. J. Visseren, Hanne Ellekjær

Correspondence to: [mari.nordbo.gynnild@ntnu.no](mailto:mari.nordbo.gynnild@ntnu.no)

| <b>Table of contents</b>                                                                                                                                         |             |
|------------------------------------------------------------------------------------------------------------------------------------------------------------------|-------------|
|                                                                                                                                                                  | <b>Page</b> |
| <b>Supplementary methods</b>                                                                                                                                     | 3-4         |
| <b>Table S1.</b> Definitions of variables in the SMART-REACH model                                                                                               | 5           |
| <b>Table S2.</b> Guideline recommended targets and effect measures from meta-analyses used when calculating treatment benefits from optimization of risk factors | 6-7         |
| <b>Table S3.</b> Overview of missing values at index stay and 3-month visit                                                                                      | 8           |
| <b>Table S4.</b> Cardiovascular medications at discharge and at 3 months follow-up                                                                               | 9           |
| <b>Figure S1.</b> Flexible calibration curve showing the agreement between observed 2-year risk and predicted risk before recalibration                          | 10          |
| <b>Figure S2.</b> Flexible calibration curve with exclusion of patients with cardioembolic stroke etiology                                                       | 11          |
| <b>Figure S3.</b> Sex-specific flexible calibration curves                                                                                                       | 12          |
| <b>Figure S4.</b> Cardiovascular risk estimation based on low density lipoprotein cholesterol levels                                                             | 13-14       |
| <b>Figure S5.</b> Cardiovascular risk estimation based on systolic blood pressure levels                                                                         | 15-16       |
| <b>Figure S6.</b> Cardiovascular risk estimation based on smoking cessation                                                                                      | 17          |
| <b>Figure S7.</b> Subgroups of estimated 10-year risk and lifetime risk of recurrent vascular events by age groups                                               | 18          |
| <b>Table S5.</b> Patient characteristics stratified by quartiles of 10-year risk                                                                                 | 19          |
| <b>Table S6.</b> Patient characteristics stratified by quartiles of lifetime risk                                                                                | 20          |
| <b>Table S7.</b> Patient characteristics stratified by quartiles of 10-year absolute risk reduction                                                              | 21          |
| <b>Table S8.</b> Patient characteristics stratified by quartiles of CVD-free life years gained by optimization of therapy                                        | 22          |
| <b>Figure S8.</b> Recurrent cardiovascular events in Nor-COAST regardless of age                                                                                 | 23          |

## Supplementary Methods.

### *Definitions of variables in Table 1*

Hypertension was defined as self-reported hypertension or use of antihypertensive drugs at admission (Anatomical Therapeutic Chemical Classification System codes (ATC): C03A, C07, C08, C09A/B, C09C/D, C02A, C02C and C02D). Hypercholesterolemia was defined by use of lipid lowering drugs at admission (ATC -code: C10). Previous stroke (before the index event) or transient ischemic attack (TIA) was defined as previous ischemic stroke, TIA, hemorrhagic stroke or stroke of undetermined subtype as reported by doctor (based on review of medical records) / patient. GFR (Glomerular filtration rate) was based on the CKD-EPI equation (based on gender, age and the serum creatinine concentration measured at first day during admission) <sup>1</sup>. Blood tests were taken the first day after admission. Stroke subtype was defined according to the TOAST Trial of ORG 10172 in Acute Stroke Treatment classification <sup>2</sup>. Stroke severity was assessed by National Institutes of Health Stroke Scale (NIHSS). Prestroke cognitive impairment was defined as score  $\geq 3$  on Global Deterioration Scale assessed by study nurses' interviews of caregivers during hospital stay <sup>1</sup>. Frailty was measured using a modified version of the five-item Fried criteria <sup>1</sup>, based on reduced grip strength, slow gait speed, self-reported fatigue, low physical activity and unintentional weight loss, where 3-5 criteria present corresponds to frail. Definitions of variables also included in the SMART-REACH model are described in Table S1.

### *Registry data*

The Norwegian Stroke Registry is a medical quality register where all Norwegian hospitals have been obligated to enter medical data on all residents > 18 years of age admitted to hospital with acute stroke (ICD-10 codes I61, I61 and I64). The Norwegian Stroke Registry had a coverage (completeness) of 87 % in 2018 <sup>3,4</sup>, we therefore also linked Nor-COAST data to the Norwegian Cardiovascular Disease Registry which is more complete <sup>5</sup>. The Norwegian Cardiovascular Disease Registry is an administrative health register based on data from the Norwegian Patient Register, containing information on all admissions to hospital (main and second diagnosis), both private and public, included in the public reimbursement policy in Norway since 2008. For stroke endpoints we restricted analyses to main diagnoses of stroke which give more correct registrations <sup>5</sup>. For myocardial infarction endpoints we used both main and second diagnoses for higher completeness <sup>6</sup>. The Norwegian Causes of Death Registry provided follow-up information on cardiovascular disease as the primary cause of death. All registries are regulated according to the Act relating to Personal Health Data Registries. The quality of information in the registries have previously been described <sup>5,6</sup>.

*The use of the SMART-REACH Fine and Gray competing risk model in Nor-COAST*

The SMART-REACH risk model is a competing-risk adjusted Fine and Gray model, which can be used for estimation of both 10-year and lifetime risk of major cardiovascular events and non-cardiovascular mortality in patients with clinically manifest vascular disease. The underlying model formulas and methodology were published in the original SMART-REACH publication <sup>7</sup>. With age as underlying timescale, lifetables calculating risks for every 1-year interval are made beginning at the starting age of each individual <sup>7,8</sup> and repeated up to the maximum age of 90 years. The model was derived using adapted Fine and Gray models to allow for left truncation and right censoring <sup>9</sup>.

For better judgement of the calibration, less influenced by arbitrary grouping in comparison to a traditional calibration plot, we showed a flexible calibration curve based on local polynomial regression fitting (*loess*, function R) <sup>10-12</sup>. First, the cohort was divided in 100 quantiles of predicted risk. Then, a local regression was used to smoothly explain the observed cumulative incidence per group by the mean predicted risk per group. The smooth calibration plot and confidence bounds were subsequently predicted from this model over the whole range of relevant predicted risks (cohort predicted risk quantile 0.025 up to 0.975). A curve close to the diagonal indicates that predicted risks correspond well with the observed proportion of events <sup>10</sup>.

Recalibration of the model was considered based on the calibration plot and performed using “calibration-in-the-large” by subtracting the expected-observed ratio from the linear predictor for both the CVD hazard function as for the non-CVD mortality function <sup>10,13</sup>. The expected-observed ratio was calculated by dividing the expected incidence (mean of all predicted 2-year risks) by the observed incidence (cumulative incidence in the study population at 2 years, corrected for competing risks).

| <b>Table S1. Definitions of variables included in the SMART-REACH model <sup>7</sup> and sources</b> |                                                                                                                                                                                                                                                                                                                                                                          |
|------------------------------------------------------------------------------------------------------|--------------------------------------------------------------------------------------------------------------------------------------------------------------------------------------------------------------------------------------------------------------------------------------------------------------------------------------------------------------------------|
| <b>Variable</b>                                                                                      | <b>Source when used in present study</b>                                                                                                                                                                                                                                                                                                                                 |
| Age (years)                                                                                          | As recorded in medical journals                                                                                                                                                                                                                                                                                                                                          |
| Sex (male/female)                                                                                    | As recorded in medical journals                                                                                                                                                                                                                                                                                                                                          |
| Current smoking (yes/no)                                                                             | Patient response to smoking status at 3 months                                                                                                                                                                                                                                                                                                                           |
| Diabetes mellitus (yes/no)                                                                           | Self-reported diabetes or HbA1c $\geq$ 48 mmol/mol at admission or prescribed antidiabetic drugs at admission or discharge                                                                                                                                                                                                                                               |
| Congestive heart failure (yes/no)                                                                    | History of heart failure as reported by doctor (based on review of medical records) / patient                                                                                                                                                                                                                                                                            |
| Atrial fibrillation (yes/no)                                                                         | Self-reported or documented on electrocardiogram or telemetry during admission                                                                                                                                                                                                                                                                                           |
| Systolic blood pressure (mmHg)                                                                       | Measured thrice by the same physician at 3 months with one-minute intervals and the average of the second and third measurements was used in the analysis                                                                                                                                                                                                                |
| Creatinine ( $\mu$ mol/L)                                                                            | Serum concentration at 3 months                                                                                                                                                                                                                                                                                                                                          |
| Total cholesterol (mmol/L)                                                                           | Non-fasting serum concentrations from venous blood measured in fresh samples at 3 months                                                                                                                                                                                                                                                                                 |
| LDL cholesterol (mmol/L)                                                                             | Non-fasting serum concentrations from venous blood measured in fresh samples at 3 months                                                                                                                                                                                                                                                                                 |
| History of cerebrovascular disease (yes/no)                                                          | All patients were registered with cerebrovascular disease, since stroke was an inclusion criterion in the Nor-COAST study.                                                                                                                                                                                                                                               |
| History of coronary heart disease (yes/no)                                                           | Previous angina pectoris, myocardial infarction or coronary revascularization (coronary bypass surgery or percutaneous coronary intervention) as reported by doctor (based on review of medical records) / patient                                                                                                                                                       |
| History of peripheral artery disease (yes/no)                                                        | Symptomatic or documented obstruction of distal arteries of the leg or surgery of the leg or documented surgery of aorta as reported by doctor (based on review of medical records) / patient                                                                                                                                                                            |
| Use of antithrombotic drugs (yes/no)                                                                 | Use of aspirin or equivalent drug belonging to the Anatomical Therapeutic Chemical (ATC) Classification System group B01A at 3 months. As reported by the patient or doctor, if information regarding medications in use were missing, we contacted general practitioners, home care services or used the electronic summary care record for safer healthcare in Norway. |

Abbreviations: HbA1c; Hemoglobin A1c. Nor-COAST; Norwegian Cognitive Impairment after Stroke.

| <b>Table S2. Guideline recommended targets and effect measures from meta-analyses used when calculating treatment benefits from optimization of risk factors</b> |                                                                                                                   |                                                                                                                                                                                                                                                                                                                                                                                                                                                          |                                                                                                                                                                                                                                                                                                                                                                                                                                                                |
|------------------------------------------------------------------------------------------------------------------------------------------------------------------|-------------------------------------------------------------------------------------------------------------------|----------------------------------------------------------------------------------------------------------------------------------------------------------------------------------------------------------------------------------------------------------------------------------------------------------------------------------------------------------------------------------------------------------------------------------------------------------|----------------------------------------------------------------------------------------------------------------------------------------------------------------------------------------------------------------------------------------------------------------------------------------------------------------------------------------------------------------------------------------------------------------------------------------------------------------|
| <b>Risk factor target</b>                                                                                                                                        | <b>Guideline defined treatment and target</b>                                                                     | <b>Effect measures and literature references</b>                                                                                                                                                                                                                                                                                                                                                                                                         | <b>Comments</b>                                                                                                                                                                                                                                                                                                                                                                                                                                                |
| Lipid targets                                                                                                                                                    | LDL-C $\leq$ 1.8 mmol/L <sup>14</sup>                                                                             | <p>A hazard ratio (HR) of 0.78 was assumed per 1.0 mmol/L reduction in LDL-C <sup>15</sup>. Patients who had already achieved the target were modelled with a HR of 1.00, regardless whether this was achieved by lifestyle or medication.</p> <p>LDL-C reduction in mmol/L was defined as the 3-month LDL-C level minus 1.8 mmol/L. We assumed no further risk reduction from lowering LDL-C below 1.8 mmol/L.</p>                                      | We used the effect measure from a meta-analysis with patients from both primary and secondary preventive settings, where subgroup analyses have shown that the relative risk reduction is more or less the same across several groups of patients suggesting broadly generalizable benefits. We therefore assume these effects also are valid in subgroups of stroke patients.                                                                                 |
| Blood pressure targets                                                                                                                                           | Systolic blood pressure $\leq$ 140 mmHg <sup>14</sup>                                                             | <p>A 10 mmHg reduction in systolic BP was assumed to correspond to a cardiovascular specific HR of 0.80 <sup>16</sup>. Patients who had already achieved this target were modelled with a HR of 1.00, regardless whether this was achieved by lifestyle or medication.</p> <p>BP reduction in mmHg was defined as the 3-month systolic BP minus the target systolic BP of 140. We assumed no further risk reduction from lowering BP below 140 mmHg.</p> | We used the effect measure from a meta-analysis with patients from both primary and secondary preventive settings (including stroke patients), where subgroup analyses have shown that the relative risk reduction is more or less the same across several groups of patients. A HR of 0.80 for the combined endpoint of major cardiovascular events was used. However, the relative effect for stroke separately seems to be larger (HR 0.73) <sup>16</sup> . |
| Antithrombotic treatment                                                                                                                                         | Aspirin or other equivalent antiplatelet drugs. Anticoagulation if non-valvular atrial fibrillation <sup>14</sup> | Estimated risk is based on the assumption that standard care is provided. Such standard care (HR                                                                                                                                                                                                                                                                                                                                                         | The HR for long-term aspirin (0.81) monotherapy in secondary preventive setting from the meta-                                                                                                                                                                                                                                                                                                                                                                 |

|                |                                 |                                                                                                                                                                                                                                                                                                                                                                            |                                                                                                                                                                                                                                                                                                       |
|----------------|---------------------------------|----------------------------------------------------------------------------------------------------------------------------------------------------------------------------------------------------------------------------------------------------------------------------------------------------------------------------------------------------------------------------|-------------------------------------------------------------------------------------------------------------------------------------------------------------------------------------------------------------------------------------------------------------------------------------------------------|
|                |                                 | 1.00) included aspirin or equivalent type of antithrombotic therapy, including vitamin K antagonists or DOACs, regardless of number of antithrombotic drugs in use. We assumed that no use of antithrombotic therapy was associated with the inverse effect of starting (at least) aspirin (i.e., HR $1/0.81 = 1.23$ ) <sup>17</sup> .                                     | analysis <sup>17</sup> was used. The estimate is based on 16 secondary preventive trials from whom 10 was in stroke or patients with transient ischemic attack.<br><br>The benefit of different antithrombotic regimens was not assessed since the proportion not using antithrombotic drugs was low. |
| Smoking target | Smoking cessation <sup>14</sup> | The effect of smoking cessation was estimated in current smokers and was assumed to reduce the risk of both CVD events and non-CVD mortality. The HR for CVD events for current smokers when converting to ex-smoker was assumed to be 0.60 <sup>18</sup> . The HR for non-CVD mortality for current smokers who are now ex-smokers was assumed to be 0.73 <sup>19</sup> . | In absence of evidence from RCTs, the effect of smoking cessation was estimated from observational studies, using the hazard ratio between current and former smoking.                                                                                                                                |

Abbreviations: LDL, Low-density lipoprotein; BP, blood pressure; DOACs, Direct Oral Anticoagulants; RCTs, Randomized Controlled Trials; TIA, Transient ischemic attack

**Table S3. Overview of missing values at index stay and 3-month visit (n=465)**

|                                       | n (%) missing at index stay | n (%) missing at 3-month visit |
|---------------------------------------|-----------------------------|--------------------------------|
| Age                                   | 0                           | 0                              |
| Sex                                   | 0                           | 0                              |
| Current smoking                       | 1 (0.2%)                    | 68 (15%)                       |
| Diabetes mellitus                     | 0                           | 0                              |
| Systolic blood pressure               | 34 (7%)                     | 72 (15%)                       |
| Total cholesterol                     | 8 (2%)                      | 113 (24%)                      |
| HDL cholesterol                       | 12 (3%)                     | 117 (25%)                      |
| LDL cholesterol                       | 15 (3%)                     | 115 (25%)                      |
| Creatinine                            | 2 (0.4%)                    | 119 (26%)                      |
| Coronary artery disease               | 0                           | 0                              |
| Peripheral artery disease (incl. AAA) | 0                           | 0                              |
| Heart failure                         | 0                           | 0                              |
| Atrial fibrillation                   | 0                           | 0                              |
| Information about medications         | 5 (1%)                      | 32 (7%)                        |

Missing values for current smoking, systolic blood pressure, cholesterol, creatinine and information about medications were imputed using single imputation by predictive mean matching for the purpose of CVD risk prediction and assessment of changes in risk factor levels from index stay to 3-months follow-up. With this method, the imputed value is taken randomly from a set of observed values whose predicted values are closest to the predicted value from a specified regression model. For the baseline characteristics age, sex, history of diabetes, coronary artery disease, peripheral artery disease, heart failure and atrial fibrillation, we assumed that registrations at index stay also were valid at the 3-month visit. Abbreviations: eGFR; Estimated glomerular filtration rate. AAA; Abdominal aortic aneurism, HDL; High-density lipoprotein, LDL; Low-density lipoprotein.



**Table S4. Cardiovascular medications at discharge from index stay and at 3 months of follow-up for patients with available detailed data on medications in use**

|                                                           | Discharge (n = 460) | 3-month visit (n = 433) |
|-----------------------------------------------------------|---------------------|-------------------------|
| <b>Antithrombotic drugs</b>                               |                     |                         |
| No <sup>a</sup>                                           | 9 (2%)              | 8 (2%)                  |
| Single antiplatelet therapy                               | 111 (24%)           | 130 (30%)               |
| Dual antiplatelet therapy                                 | 189 (41%)           | 150 (35%)               |
| Anticoagulation monotherapy                               | 107 (23%)           | 114 (25%)               |
| Anticoagulation in combination with antiplatelet agent(s) | 44 (10%)            | 31 (7%)                 |
| <b>Number of antihypertensive drugs</b>                   |                     |                         |
| 0 <sup>a</sup>                                            | 144 (31%)           | 118 (27%)               |
| 1                                                         | 167 (36%)           | 160 (37%)               |
| 2                                                         | 105 (23%)           | 101 (23%)               |
| 3                                                         | 33 (7%)             | 43 (10%)                |
| >3                                                        | 11 (2%)             | 11 (3%)                 |
| <b>Lipid-lowering drugs</b>                               |                     |                         |
| No <sup>a</sup>                                           | 45 (10%)            | 42 (10%)                |
| Any statin monotherapy                                    | 407 (88%)           | 381 (88%)               |
| Low-moderate intensity statin <sup>b</sup>                | 142 (30%)           | 133 (31%)               |
| High intensity statin <sup>b</sup>                        | 265 (58%)           | 248 (57%)               |
| Ezetimibe monotherapy                                     | 3 (1%)              | 6 (1%)                  |
| Statin + ezetimibe                                        | 5 (1%)              | 4 (1%)                  |

<sup>a</sup>Of patients with available follow-up information about medications in use at both discharge and 3 months (n=429), 5 out of 8 patients not using (any) antithrombotic drugs (ATC code: B01A) at discharge started antithrombotic treatment between 0 and 3 months, while 4 out of 421 prescribed antithrombotic drugs at discharge discontinued between 0 and 3 months. For antihypertensive drugs (ATC codes: C03A, C07, C08, C09A/B, C09C/D, C02A, C02C and C02D), corresponding numbers were 28 / 133 and 12 / 296. For lipid-lowering drugs (ATC code: C10), corresponding numbers were 12 / 40 and 11 / 389.

<sup>b</sup>High-intensity statin was defined as atorvastatin  $\geq 40$  mg/d or other equivalent drug as described previously <sup>1</sup>. Low-moderate intensity statin was defined as  $< 40$  mg atorvastatin or other equivalent drug. Abbreviations: ATC, Anatomical Therapeutic Chemical classification system

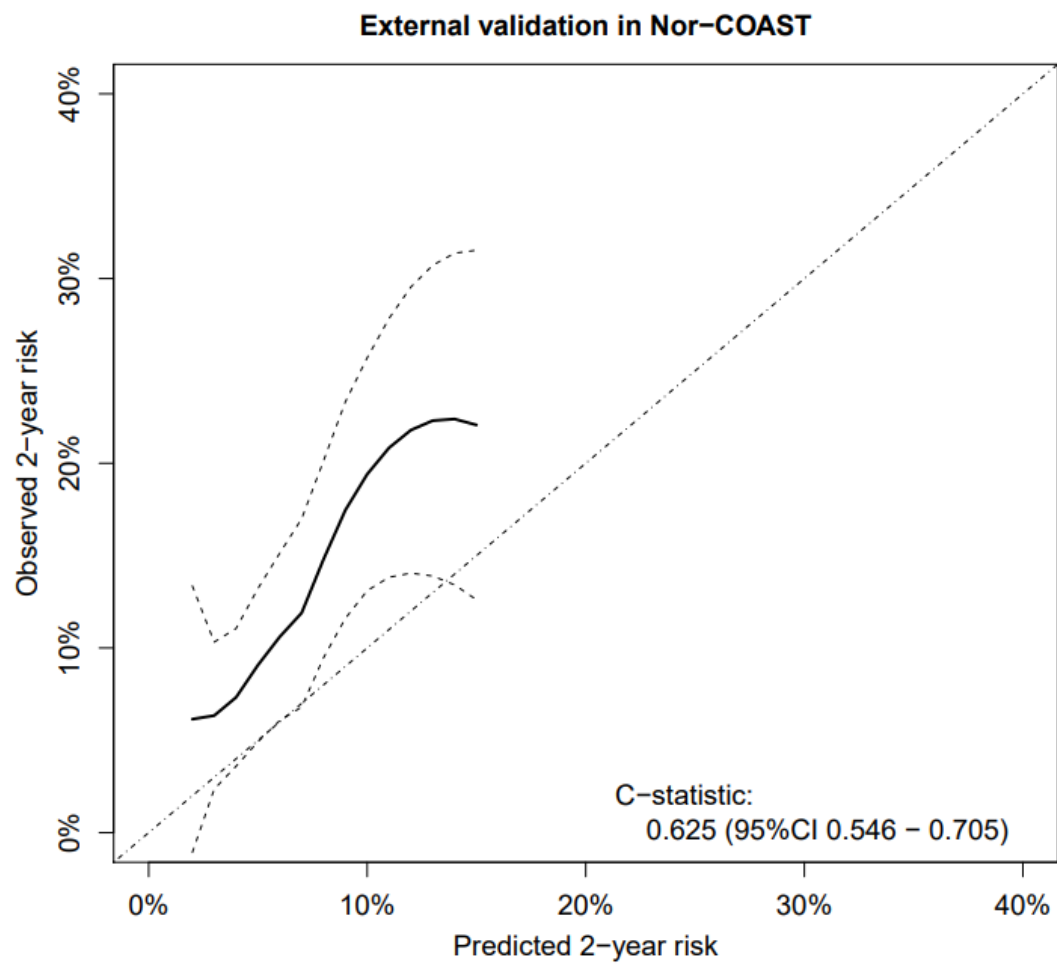

**Figure S1.** Flexible calibration curve showing the agreement between estimated risk of stroke, myocardial infarction or vascular death by the SMART-REACH model and observed 2-year risk before recalibration

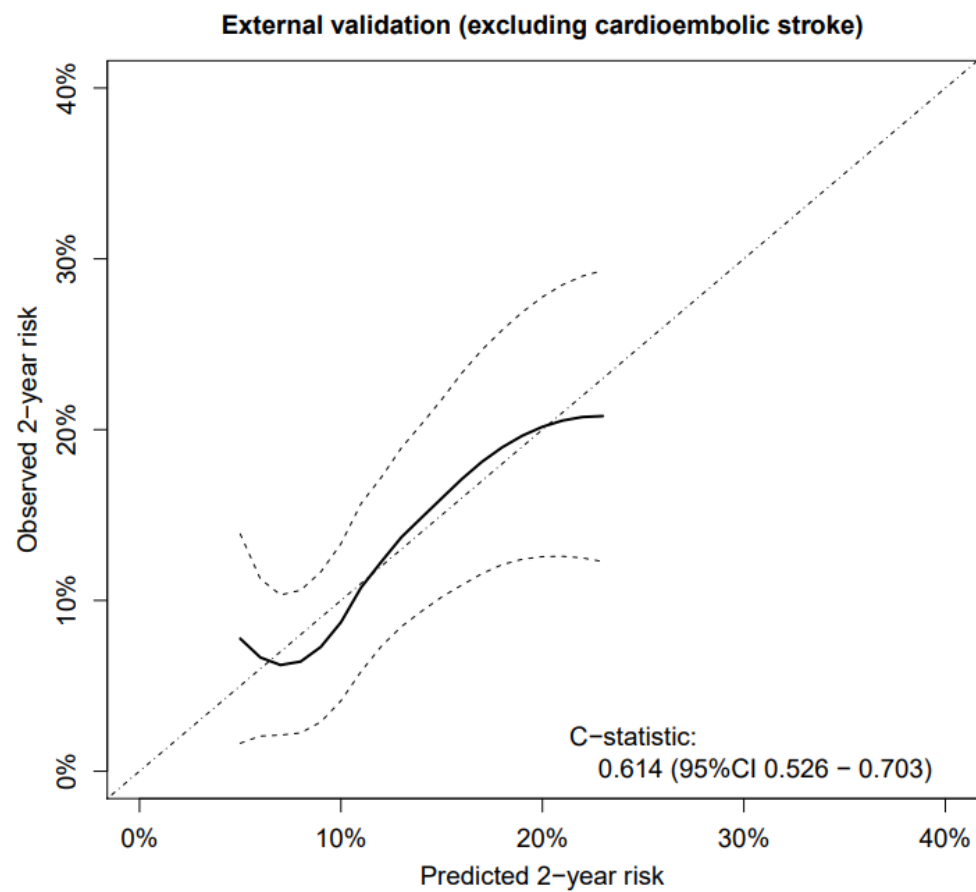

**Figure S2.** Flexible calibration curve showing the agreement between estimated risk of stroke, myocardial infarction or vascular death by the SMART-REACH model versus observed 2-year risk when excluding patients with cardioembolic stroke etiology according to the TOAST-classification

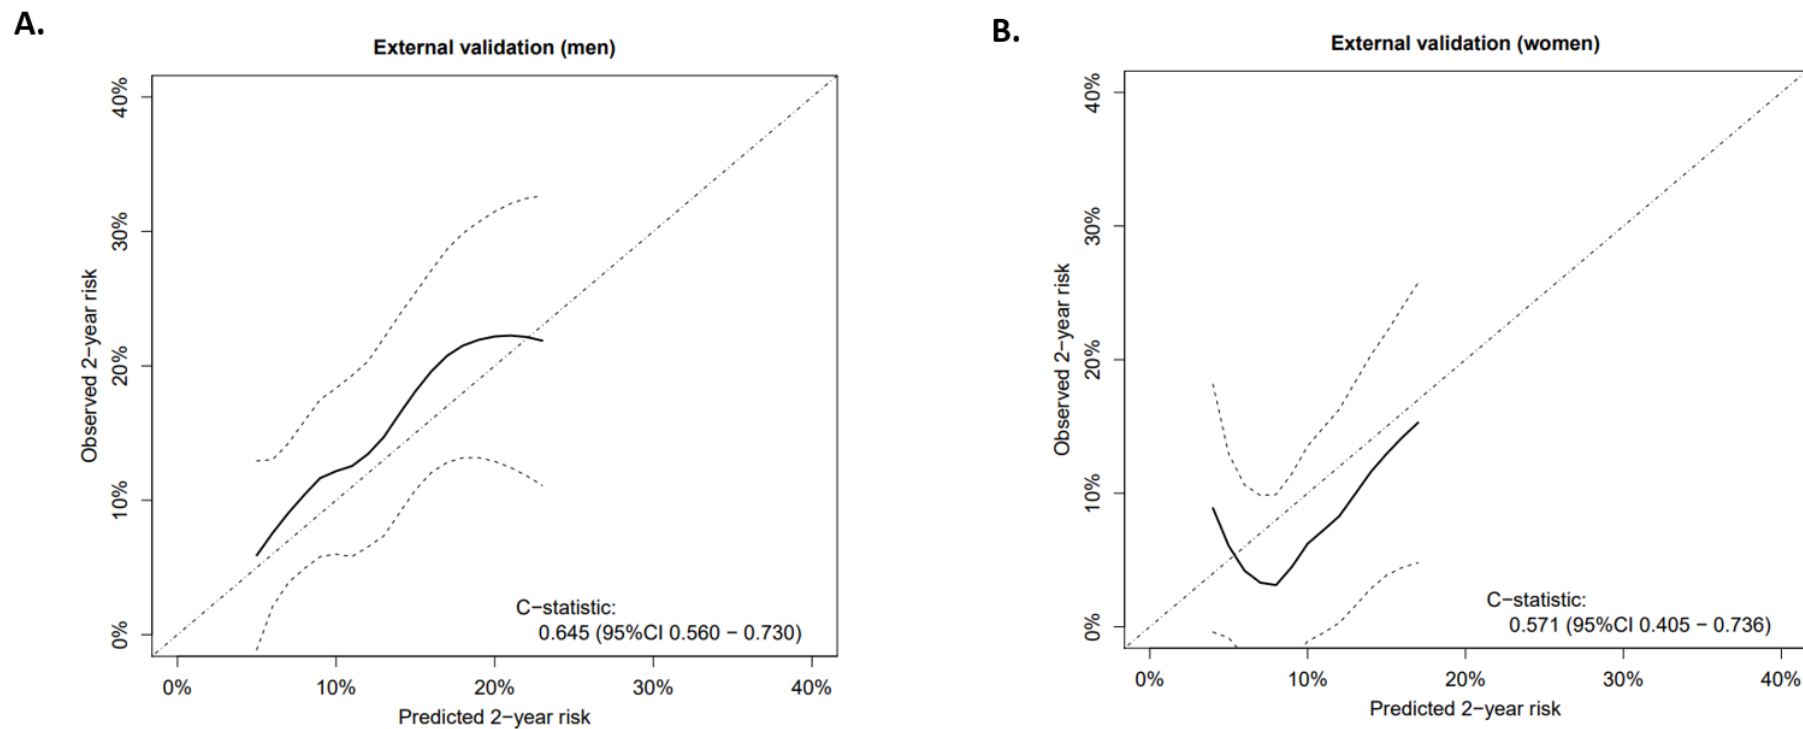

**Figure S3.** Sex-specific flexible calibration curves showing the agreement between estimated risk of stroke, myocardial infarction or vascular death by the SMART-REACH model versus observed 2-year risk for a) men (n=278) and b) women (n=178).

**Notes:** Number of CVD events for men and women were n=34 and n=18, respectively. Number of non-CVD related deaths were n=10 and n=5 for men and women respectively.

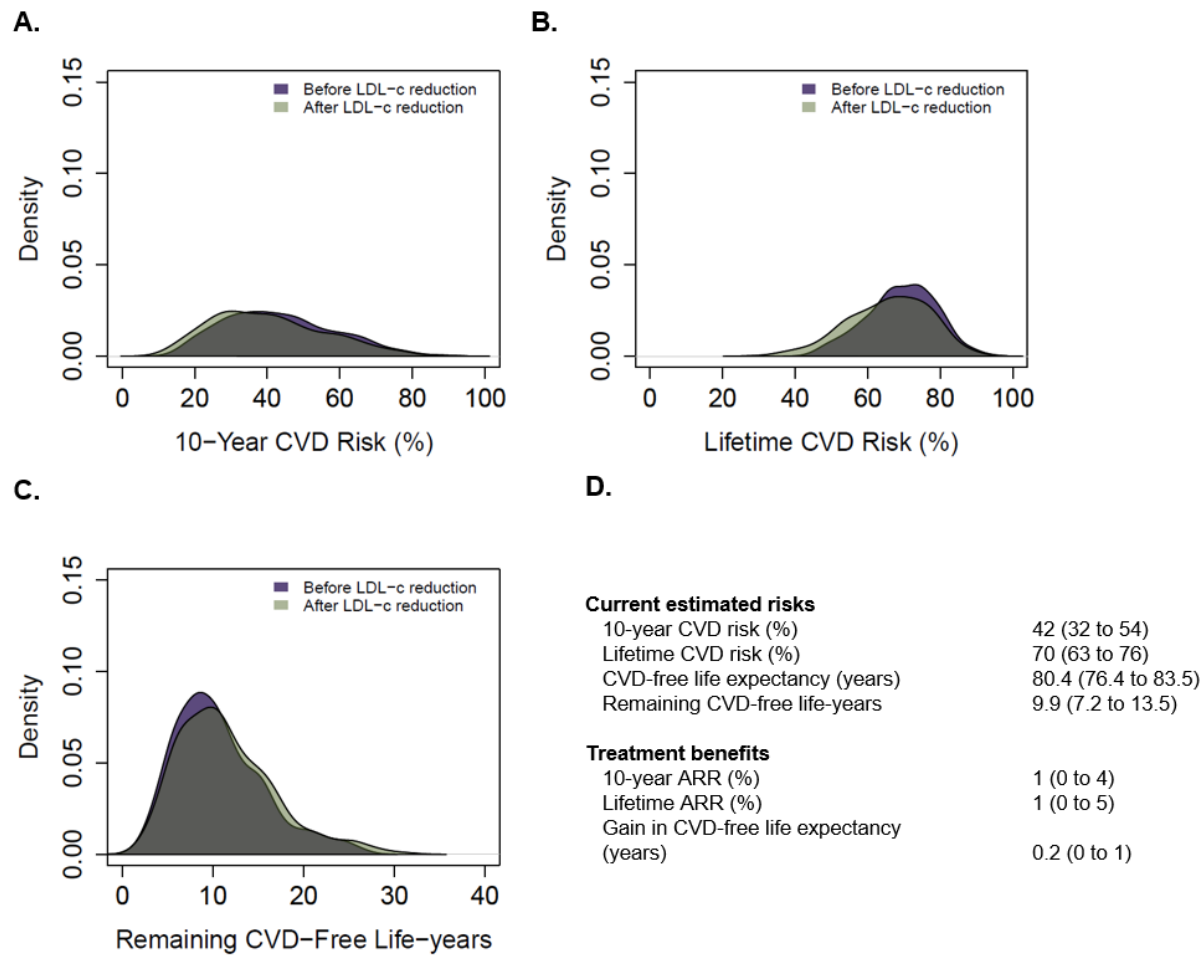

**Figure S4a. Current cardiovascular risk and potential benefit from optimization of LDL-C levels (n = 465)**

Distributions of **A.** Ten-year cardiovascular disease risk, **B.** Lifetime CVD risk, **C.** Remaining CVD-free life-years, **D.** Current estimated risks and treatment benefits (median (interquartile range)) from optimization of LDL-C level to  $\leq 1.8$  mmol/L in all patients. Abbreviations: LDL-C; Low density lipoprotein cholesterol, CVD; Cardiovascular disease, ARR: Absolute risk reduction

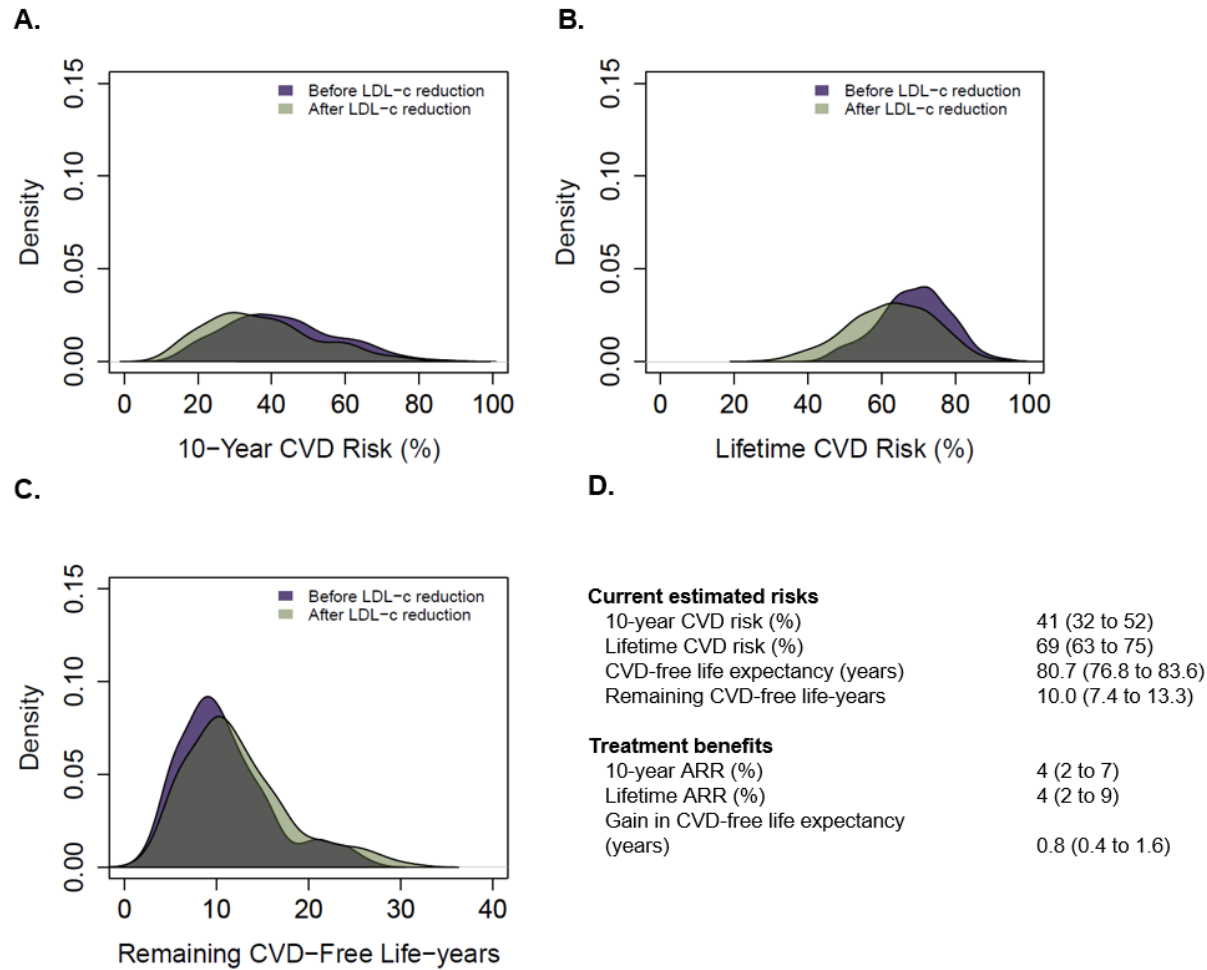

**Figure S4b. Current cardiovascular risk and potential benefit from optimization of LDL-C levels in patients with LDL-C > 1.8 mmol/L (n = 265)**  
Distributions of **A.** Ten-year cardiovascular disease risk, **B.** Lifetime CVD risk, **C.** Remaining CVD-free life-years, **D.** Current estimated risks and treatment benefits (median (interquartile range)) from optimization of LDL-C level to 1.8 mmol/L in patients with LDL-C > 1.8 mmol/L. Abbreviations: LDL-C; Low density lipoprotein cholesterol, CVD; Cardiovascular disease, ARR: Absolute risk reduction

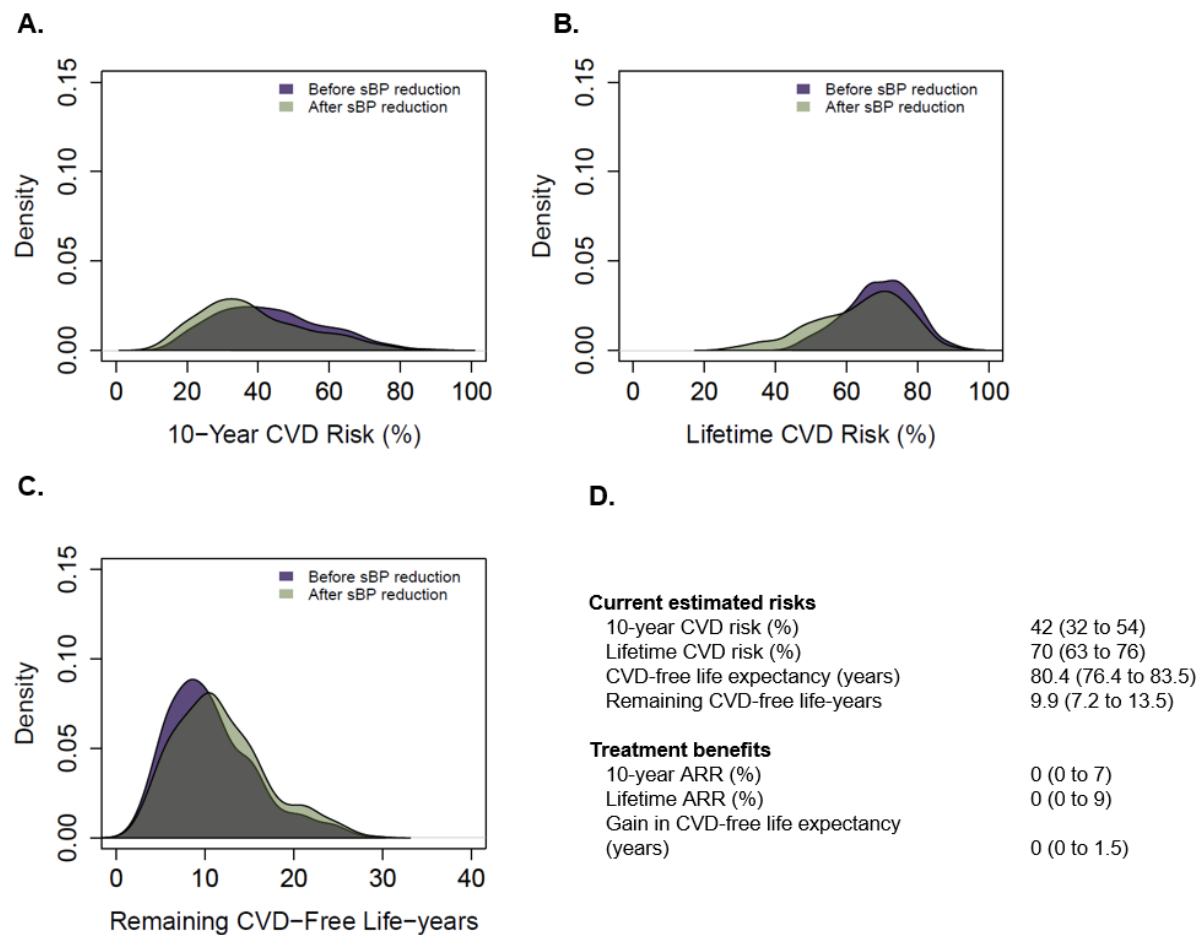

**Figure S5a. Current cardiovascular risk and potential benefit from optimization of systolic blood pressure levels (n = 465)**

Distributions of **A.** Ten-year cardiovascular disease risk, **B.** Lifetime CVD risk, **C.** Remaining CVD-free life-years, **D.** Current estimated risks and treatment benefits (median (interquartile range)) from optimization of sBP level to  $\leq 140$  mmHg in all patients. Abbreviations: sBP; Systolic blood pressure, CVD; Cardiovascular disease, ARR: Absolute risk reduction

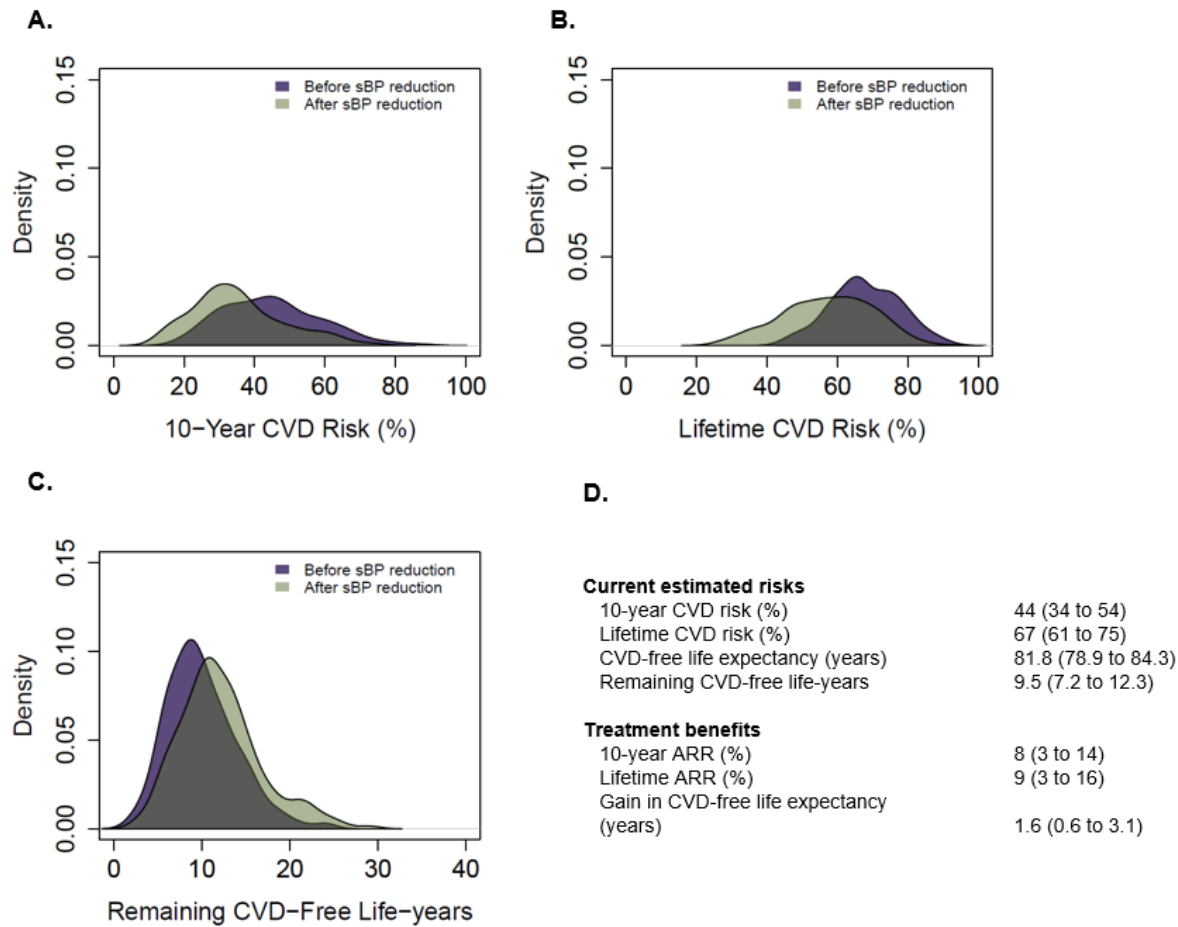

**Figure S5b. Current cardiovascular risk and potential benefit from optimization of systolic blood pressure levels (n = 226) in patients with levels above 140 mmHg.**

Distributions of **A.** Ten-year cardiovascular disease risk, **B.** Lifetime CVD risk, **C.** Remaining CVD-free life-years, **D.** Current estimated risks and treatment benefits (median (interquartile range)) from optimization of sBP level to 140 mmHg in patients with sBP > 140 mmHg (n = 226). Abbreviations: sBP; Systolic blood pressure, CVD; Cardiovascular disease, ARR: Absolute risk reduction



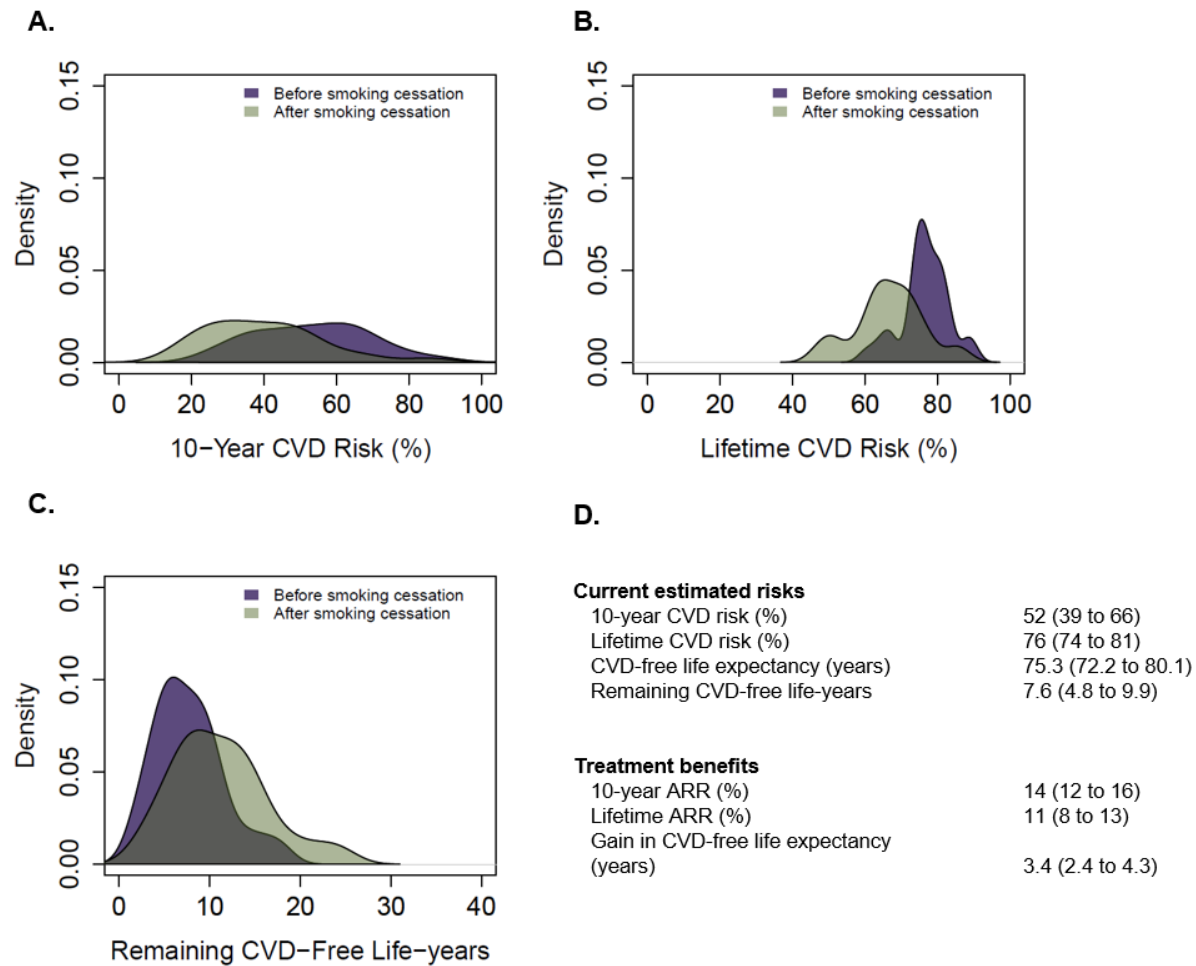

**Figure S6: Current cardiovascular risk and potential benefit from smoking cessation in smokers (n = 55)**

Distributions of **A.** Ten-year cardiovascular disease risk, **B.** Lifetime CVD risk, **C.** Remaining CVD-free life-years, **D.** Current estimated risks and treatment benefits (median (interquartile range)) from smoking cessation in patients smoking at 3 months. Abbreviations: ARR: Absolute risk reduction, CVD; Cardiovascular disease

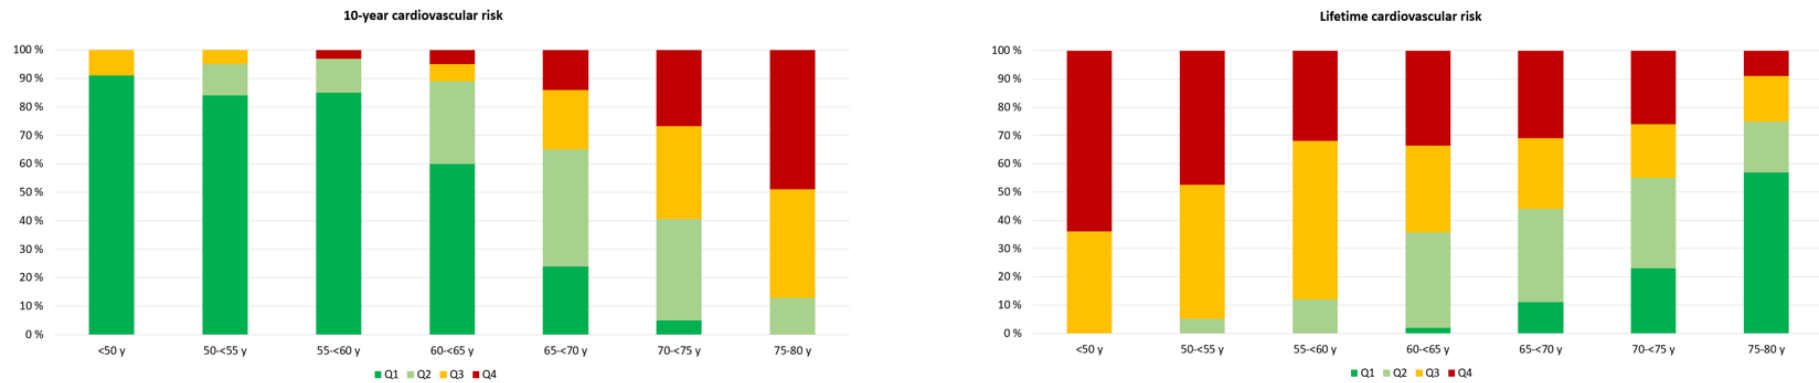

**Figure S7.** Age-specific subgroups of estimated 10-year and lifetime risk of a recurrent vascular event by the SMART REACH model in patients with ischemic stroke in the Nor-COAST study. Data are shown as quartiles of risk where Q1 corresponds to lowest risk quartile and Q4 the highest risk quartile.

**Table S5. Patient characteristics stratified by quartiles (Q1 – Q4) of estimated 10-year risk of recurrent vascular events and mortality**

|                                                    | 10-year CVD risk |                 |                 |                 |
|----------------------------------------------------|------------------|-----------------|-----------------|-----------------|
|                                                    | Q1<br>(n = 117)  | Q2<br>(n = 116) | Q3<br>(n = 116) | Q4<br>(n = 116) |
| Median (IQR) estimated 10-year risk, %             | 26 (21 to 29)    | 37 (34 to 39)   | 48 (44 to 50)   | 66 (58 to 68)   |
| Age, y                                             | 59.5 (6.2)       | 68.8 (5.6)      | 73.0 (5.6)      | 74.9 (4.5)      |
| Female sex                                         | 46 (39%)         | 49 (42%)        | 45 (39%)        | 38 (33%)        |
| Atrial fibrillation                                | 7 (6%)           | 14 (12%)        | 30 (26%)        | 50 (43%)        |
| Diabetes mellitus                                  | 2 (2%)           | 13 (11%)        | 19 (16%)        | 58 (50%)        |
| ≥ 2 vascular areas <sup>a</sup> affected           | 2 (2%)           | 9 (8%)          | 20 (17%)        | 65 (56%)        |
| Current smoker <sup>b</sup>                        | 5 (5%)           | 11 (10%)        | 13 (11%)        | 26 (22%)        |
| Systolic blood pressure (mmHg) <sup>b</sup>        | 137 (16)         | 139 (15)        | 144 (18)        | 140 (25)        |
| Total cholesterol <sup>b</sup> , mmol/L            | 4.0 (0.8)        | 4.1 (1.0)       | 4.1 (1.0)       | 3.9 (0.8)       |
| LDL cholesterol <sup>b</sup> , mmol/L              | 2.1 (0.8)        | 2.2 (0.8)       | 2.1 (0.8)       | 2.0 (0.7)       |
| eGFR (ml/min/1.73 m <sup>2</sup> ) <sup>b, c</sup> | 87 (12)          | 81 (13)         | 75 (15)         | 65 (18)         |
| Frail <sup>d</sup>                                 | 3 (3%)           | 6 (5%)          | 9 (8%)          | 16 (14%)        |
| Prestroke dementia <sup>e</sup>                    | 0 (0%)           | 1 (1%)          | 3 (3%)          | 9 (8%)          |

Values are n / N (%) or mean (standard deviation) if other not specified. <sup>a</sup>Number of vascular areas were one if only stroke, two if combined with either coronary artery disease or peripheral artery disease, and three if all three areas were affected. <sup>b</sup>Measured at 3 months follow-up. <sup>c</sup>CKD-EPI equation. <sup>d</sup>Frailty measured by 5-item Fried frailty criteria. <sup>e</sup>Cognitive impairment defined as score ≥ 3 on Global Deterioration Scale. Abbreviations: CVD, Cardiovascular disease; IQR, Interquartile range; LDL, Low density lipoprotein; eGFR, Estimated Glomerular Filtration Rate.

**Table S6. Patient characteristics stratified by quartiles (Q1 – Q4) of estimated lifetime risk of recurrent vascular events and mortality**

|                                                    | Lifetime CVD risk |                 |                 |                 |
|----------------------------------------------------|-------------------|-----------------|-----------------|-----------------|
|                                                    | Q1<br>(n = 117)   | Q2<br>(n = 116) | Q3<br>(n = 116) | Q4<br>(n = 116) |
| Median (IQR) estimated life-time risk, %           | 58 (54 to 61)     | 67 (65 to 68)   | 73 (71 to 74)   | 80 (78 to 83)   |
| Age, y                                             | 75.6 (3.7)        | 69.9 (5.9)      | 65.7 (8.6)      | 64.8 (8.8)      |
| Female sex                                         | 67 (57%)          | 49 (42%)        | 32 (28%)        | 30 (26%)        |
| Atrial fibrillation                                | 18 (15%)          | 28 (24%)        | 23 (20%)        | 32 (28%)        |
| Diabetes mellitus                                  | 0 (0%)            | 9 (8%)          | 29 (25%)        | 55 (47%)        |
| ≥ 2 vascular areas <sup>a</sup> affected           | 6 (6%)            | 17 (14%)        | 26 (23%)        | 47 (41%)        |
| Current smoker <sup>b</sup>                        | 2 (2%)            | 6 (5%)          | 18 (16%)        | 29 (25%)        |
| Systolic blood pressure (mmHg) <sup>b</sup>        | 144 (16)          | 142 (19)        | 136 (18)        | 138 (23)        |
| Total cholesterol <sup>b</sup> , mmol/L            | 4.2 (0.8)         | 4.2 (1.0)       | 4.0 (0.9)       | 3.8 (0.9)       |
| LDL cholesterol <sup>b</sup> , mmol/L              | 2.2 (0.8)         | 2.2 (0.8)       | 2.1 (0.8)       | 2.0 (0.7)       |
| eGFR (ml/min/1.73 m <sup>2</sup> ) <sup>b, c</sup> | 77 (12)           | 79 (15)         | 81 (15)         | 71 (22)         |
| Frail <sup>d</sup>                                 | 11 (9%)           | 10 (9%)         | 4 (3%)          | 9 (8%)          |
| Prestroke dementia <sup>e</sup>                    | 5 (4%)            | 4 (4%)          | 0 (0%)          | 4 (4%)          |

Values are n / N (%) or mean (standard deviation) if other not specified. <sup>a</sup>Number of vascular areas were one if only stroke, two if combined with either coronary artery disease or peripheral artery disease, and three if all three areas were affected. <sup>b</sup>Measured at 3 months follow-up. <sup>c</sup>CKD-EPI equation. <sup>d</sup>Frailty measured by 5-item Fried frailty criteria. <sup>e</sup>Cognitive impairment defined as score ≥ 3 on Global Deterioration Scale. Abbreviations: CVD, Cardiovascular disease; IQR, Interquartile range; LDL, Low density lipoprotein; eGFR, Estimated Glomerular Filtration Rate.

| <b>Table S7. Patient characteristics stratified by quartiles (Q1 – Q4) of estimated 10-year ARR of recurrent vascular events and mortality</b> |                         |                         |                         |                         |
|------------------------------------------------------------------------------------------------------------------------------------------------|-------------------------|-------------------------|-------------------------|-------------------------|
|                                                                                                                                                | <b>10-year ARR</b>      |                         |                         |                         |
|                                                                                                                                                | <b>Q1<br/>(n = 117)</b> | <b>Q2<br/>(n = 116)</b> | <b>Q3<br/>(n = 116)</b> | <b>Q4<br/>(n = 116)</b> |
| Median (IQR) estimated 10-year ARR, %                                                                                                          | 0% (0 to 0)             | 3% (2 to 4)             | 10% (8 to 12)           | 21% (16 to 27)          |
| Age, y                                                                                                                                         | 67.4 (8.5)              | 67.5 (8.8)              | 69.4 (7.5)              | 71.7 (6.8)              |
| Female sex                                                                                                                                     | 42 (36%)                | 42 (36%)                | 41 (35%)                | 53 (46%)                |
| Atrial fibrillation                                                                                                                            | 31 (27%)                | 22 (19%)                | 22 (19%)                | 26 (22%)                |
| Diabetes mellitus                                                                                                                              | 17 (15%)                | 21 (18%)                | 23 (20%)                | 31 (27%)                |
| ≥ 2 vascular areas <sup>a</sup> affected                                                                                                       | 18 (16%)                | 27 (23%)                | 20 (17%)                | 31 (27%)                |
| Current smoker <sup>b</sup>                                                                                                                    | 0 (0%)                  | 1 (1%)                  | 8 (7%)                  | 46 (40%)                |
| Systolic blood pressure (mmHg) <sup>b</sup>                                                                                                    | 128 (10)                | 132 (12)                | 146 (13)                | 155 (23)                |
| Total cholesterol <sup>b</sup> , mmol/L                                                                                                        | 3.4 (0.6)               | 3.9 (0.5)               | 4.3 (0.8)               | 4.5 (1.2)               |
| LDL cholesterol <sup>b</sup> , mmol/L                                                                                                          | 1.6 (0.3)               | 2.1 (0.4)               | 2.3 (0.8)               | 2.6 (1.0)               |
| eGFR (ml/min/1.73 m <sup>2</sup> ) <sup>b, c</sup>                                                                                             | 80 (14)                 | 77 (18)                 | 77 (16)                 | 75 (17)                 |
| Frail <sup>d</sup>                                                                                                                             | 6 (5%)                  | 7 (6%)                  | 7 (6%)                  | 14 (12%)                |
| Prestroke dementia <sup>e</sup>                                                                                                                | 2 (2%)                  | 5 (4%)                  | 2 (2%)                  | 4 (4%)                  |

Values are n / N (%) or mean (standard deviation) if other not specified. <sup>a</sup>Number of vascular areas were one if only stroke, two if combined with either coronary artery disease or peripheral artery disease, and three if all three areas were affected. <sup>b</sup>Measured at 3 months follow-up. <sup>c</sup>CKD-EPI equation. <sup>d</sup>Frailty measured by 5-item Fried frailty criteria. <sup>e</sup>Cognitive impairment defined as score ≥ 3 on Global Deterioration Scale. Abbreviations: IQR, Interquartile range; ARR, Absolute risk reduction; LDL, Low density lipoprotein; eGFR, Estimated Glomerular Filtration Rate.

| <b>Table S8. Patient characteristics stratified by quartiles (Q1 – Q4) of lifetime benefit from optimization of risk factors</b> |                                    |                         |                         |                         |
|----------------------------------------------------------------------------------------------------------------------------------|------------------------------------|-------------------------|-------------------------|-------------------------|
|                                                                                                                                  | <b>Gain in CVD-free life years</b> |                         |                         |                         |
|                                                                                                                                  | <b>Q1<br/>(n = 122)</b>            | <b>Q2<br/>(n = 117)</b> | <b>Q3<br/>(n = 113)</b> | <b>Q4<br/>(n = 113)</b> |
| Median (IQR) lifetime benefit (in terms of CVD-free life years)                                                                  | 0 (0 to 0)                         | 0.6 (0.4 to 1.0)        | 2.3 (1.8 to 2.8)        | 5.3 (4.3 to 7.1)        |
| Age, y                                                                                                                           | 68.6 (8.2)                         | 69.2 (7.9)              | 71.2 (7.1)              | 66.0 (8.7)              |
| Female sex                                                                                                                       | 41 (34%)                           | 43 (37%)                | 43 (38%)                | 51 (45%)                |
| Atrial fibrillation                                                                                                              | 34 (28%)                           | 23 (20%)                | 25 (22%)                | 19 (17%)                |
| Diabetes mellitus                                                                                                                | 22 (18%)                           | 24 (21%)                | 25 (22%)                | 21 (19%)                |
| ≥ 2 vascular areas <sup>a</sup> affected                                                                                         | 25 (20%)                           | 29 (25%)                | 22 (19%)                | 20 (18%)                |
| Current smoker <sup>b</sup>                                                                                                      | 0 (0%)                             | 2 (2%)                  | 16 (14%)                | 37 (33%)                |
| Systolic blood pressure (mmHg) <sup>b</sup>                                                                                      | 128 (10)                           | 133 (14)                | 143 (17)                | 157 (19)                |
| Total cholesterol <sup>b</sup> , mmol/L                                                                                          | 3.4 (0.6)                          | 3.9 (0.6)               | 4.2 (0.8)               | 4.6 (1.1)               |
| LDL cholesterol <sup>b</sup> , mmol/L                                                                                            | 1.6 (0.3)                          | 2.0 (0.4)               | 2.3 (0.7)               | 2.7 (1.0)               |
| eGFR (ml/min/1.73 m <sup>2</sup> ) <sup>b, c</sup>                                                                               | 78 (15)                            | 73 (19)                 | 78 (13)                 | 79 (19)                 |
| Frail <sup>d</sup>                                                                                                               | 8 (7%)                             | 8 (7%)                  | 8 (7%)                  | 10 (9%)                 |
| Prestroke dementia <sup>e</sup>                                                                                                  | 2 (2%)                             | 6 (5%)                  | 4 (4%)                  | 1 (1%)                  |

Values are n / N (%) or mean (standard deviation) if other not specified. <sup>a</sup>Number of vascular areas were one if only stroke, two if combined with either coronary artery disease or peripheral artery disease, and three if all three areas were affected. <sup>b</sup>Measured at 3 months follow-up. <sup>c</sup>CKD-EPI equation. <sup>d</sup>Frailty measured by 5-item Fried frailty criteria. <sup>e</sup>Cognitive impairment defined as score ≥ 3 on Global Deterioration Scale. Abbreviations: CVD, Cardiovascular disease; IQR, Interquartile range; LDL, Low density lipoprotein; eGFR, Estimated Glomerular Filtration Rate.

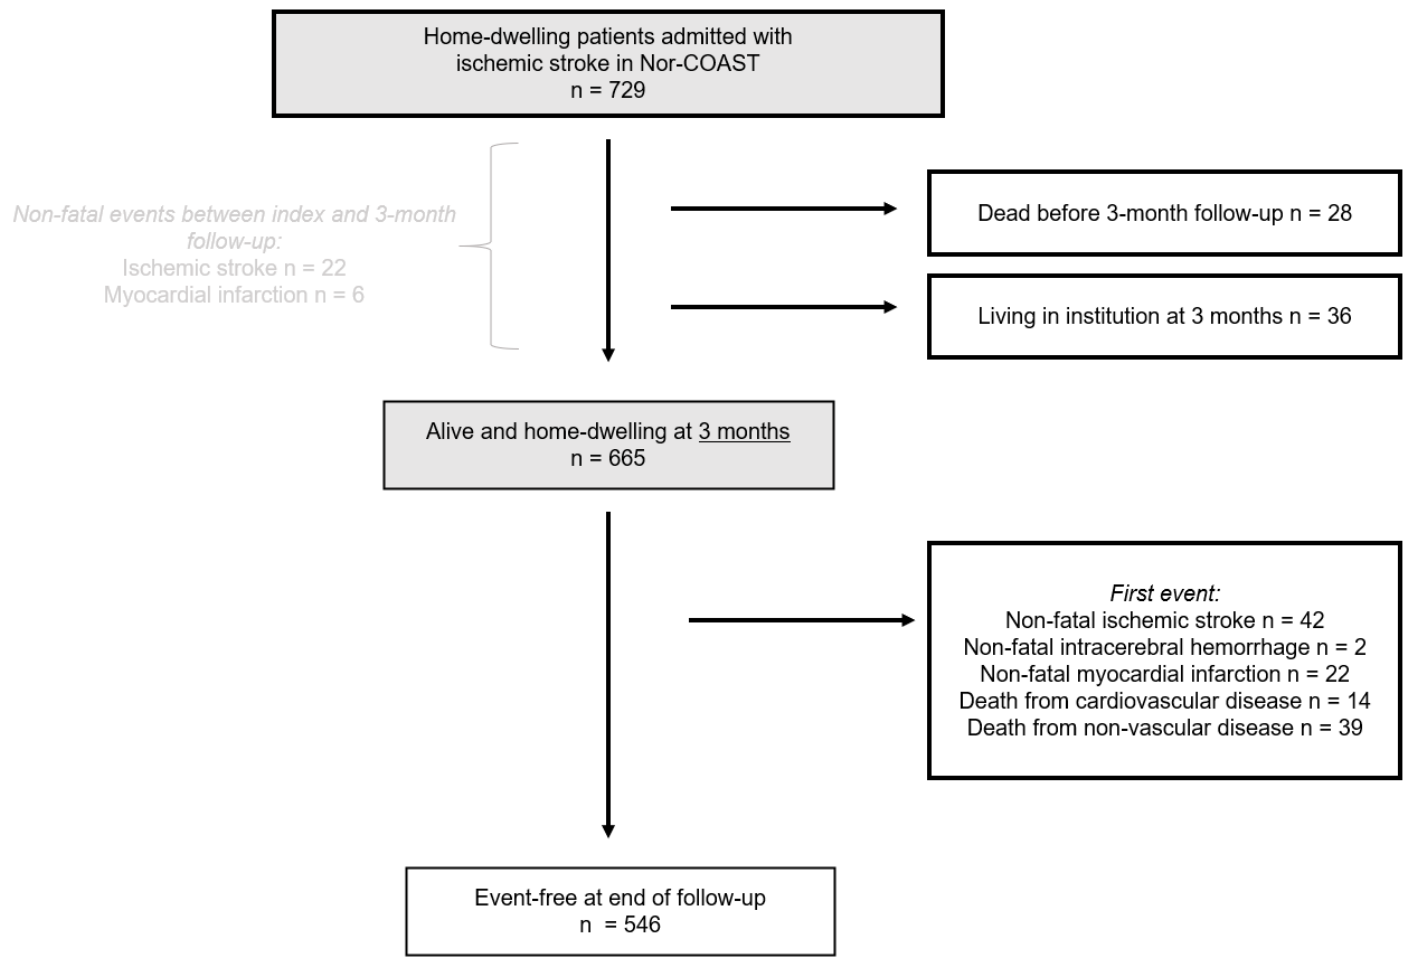

**Figure S8.** Recurrent stroke, myocardial infarction and death in home-dwelling patients with ischemic stroke in Nor-COAST regardless of age.

## References

1. Gynnild MN, Aakerøy R, Spigset O, et al. Vascular risk factor control and adherence to secondary preventive medication after ischaemic stroke. *J Intern Med.* Aug 2 2020;doi:10.1111/joim.13161
2. Adams HP, Jr., Bendixen BH, Kappelle LJ, et al. Classification of subtype of acute ischemic stroke. Definitions for use in a multicenter clinical trial. TOAST. Trial of Org 10172 in Acute Stroke Treatment. *Stroke.* Jan 1993;24(1):35-41.
3. Norwegian Stroke Registry. Annual report Accessed 01/06, 2020.  
[https://www.kvalitetsregistre.no/sites/default/files/1\\_arsrapport\\_2018\\_hjerneslag\\_0.pdf](https://www.kvalitetsregistre.no/sites/default/files/1_arsrapport_2018_hjerneslag_0.pdf)
4. Kuvås KR, Saltvedt I, Aam S, Thingstad P, Ellekjær H, Askim T. The Risk of Selection Bias in a Clinical Multi-Center Cohort Study. Results from the Norwegian Cognitive Impairment After Stroke (Nor-COAST) Study. *Clin Epidemiol.* 2020;12:1327-1336. doi:10.2147/clep.S276631
5. Varndal T, Bakken IJ, Janszky I, et al. Comparison of the validity of stroke diagnoses in a medical quality register and an administrative health register. *Scand J Public Health.* Mar 2016;44(2):143-9. doi:10.1177/1403494815621641
6. Govatsmark RES, Janszky I, Slørdahl SA, et al. Completeness and correctness of acute myocardial infarction diagnoses in a medical quality register and an administrative health register. *Scand J Public Health.* Feb 2020;48(1):5-13. doi:10.1177/1403494818803256
7. Kaasenbrood L, Bhatt DL, Dorresteijn JAN, et al. Estimated Life Expectancy Without Recurrent Cardiovascular Events in Patients With Vascular Disease: The SMART-REACH Model. *J Am Heart Assoc.* Aug 21 2018;7(16):e009217. doi:10.1161/jaha.118.009217
8. Dorresteijn JAN, Kaasenbrood L, Cook NR, et al. How to translate clinical trial results into gain in healthy life expectancy for individual patients. *BMJ.* 2016;352:i1548. doi:10.1136/bmj.i1548
9. Geskus RB. Cause-specific cumulative incidence estimation and the fine and gray model under both left truncation and right censoring. *Biometrics.* Mar 2011;67(1):39-49. doi:10.1111/j.1541-0420.2010.01420.x
10. Van Calster B, McLernon DJ, van Smeden M, Wynants L, Steyerberg EW. Calibration: the Achilles heel of predictive analytics. *BMC Med.* Dec 16 2019;17(1):230. doi:10.1186/s12916-019-1466-7
11. Steyerberg EW. *Clinical Prediction Models : A Practical Approach to Development, Validation, and Updating.* 2nd ed. 2019. ed. Springer International Publishing : Imprint: Springer; 2019.
12. Austin PC, Steyerberg EW. Graphical assessment of internal and external calibration of logistic regression models by using loess smoothers. *Stat Med.* Feb 10 2014;33(3):517-35. doi:10.1002/sim.5941
13. Steyerberg EW, Borsboom GJ, van Houwelingen HC, Eijkemans MJ, Habbema JD. Validation and updating of predictive logistic regression models: a study on sample size and shrinkage. *Stat Med.* Aug 30 2004;23(16):2567-86. doi:10.1002/sim.1844
14. Norwegian Guideline for Prevention of Cardiovascular Disease. The Norwegian Directorate of Health. Updated 5 March 2018. Accessed February 23, 2021. <https://www.helsedirektoratet.no/retningslinjer/forebygging-av-hjerte-og-karsykdom>
15. Baigent C, Blackwell L, Emberson J, et al. Efficacy and safety of more intensive lowering of LDL cholesterol: a meta-analysis of data from 170,000 participants in 26 randomised trials. *Lancet.* Nov 13 2010;376(9753):1670-81. doi:10.1016/s0140-6736(10)61350-5



16. Ettehad D, Emdin CA, Kiran A, et al. Blood pressure lowering for prevention of cardiovascular disease and death: a systematic review and meta-analysis. *Lancet*. Mar 05 2016;387(10022):957-67. doi:10.1016/s0140-6736(15)01225-8
17. Baigent C, Blackwell L, Collins R, et al. Aspirin in the primary and secondary prevention of vascular disease: collaborative meta-analysis of individual participant data from randomised trials. *Lancet*. May 30 2009;373(9678):1849-60. doi:10.1016/s0140-6736(09)60503-1
18. Mons U, Muezzinler A, Gellert C, et al. Impact of smoking and smoking cessation on cardiovascular events and mortality among older adults: meta-analysis of individual participant data from prospective cohort studies of the CHANCES consortium. *BMJ*. Apr 20 2015;350:h1551. doi:10.1136/bmj.h1551
19. Gellert C, Schöttker B, Brenner H. Smoking and all-cause mortality in older people: systematic review and meta-analysis. *Arch Intern Med*. Jun 11 2012;172(11):837-44. doi:10.1001/archinternmed.2012.1397
